# Supplementary material for: Progranulin gene delivery reduces plaque burden and synaptic atrophy in a mouse model of Alzheimer's disease
Source: PubMed Central journal article supplement (PMC5570501; doi:10.1371/journal.pone.0182896), 2017-08-24
Supplement: pone.0182896.s001.pdf [file pone.0182896.s001.pdf]

**pLenti6/V 5-mGranulin vector Sequence:**

1 aagggtcga gtctagaggg cccgcggttc gaagtaagc ctatccctaa  
51 ccctctctc ggtctcgatt ctacgcgtac cggttagtaa tgagtttga  
101 attaattctg tggaatgtgt gtcagttagg gtgtgaaag tccccaggct  
151 cccaggcag gcagaagtat gcaaagcatg catctcaatt agtcagcaac  
201 cagggtgga aagtccccag gctccccagc aggcagaagt atgcaaagca  
251 tgcatctcaa ttagtcagca accatagtcc cgcccctaac tccgccatc  
301 ccgcccctaa ctccgccag tccgccat tctccgccc atggctgact  
351 aatTTTTTT atttatgagc aggccgaggc cgcctctgcc tctgagctat  
401 tcagaagta gtgaggaggc tttttggag gcctaggctt tgcaaaaag  
451 ctccgggag cttgtatc cattttcga tctgatcagc acgtgtgac  
501 aattaatcat cggcatagta tatcggcata gtataatcg acaagtgag  
551 gaactaaacc atggccaagc cttgtctca agaagaatcc acctcattg  
601 aaagagcaac ggctacaatc aacagcatcc ccatctctga agactacagc  
651 gtcgccagcg cagctcttc tagcgacggc cgcatttca ctggtgtaa  
701 tgtatatcat ttactgggg gacctgtgc agaactcgtg gtgctgggca  
751 ctgctgctgc tgcggcagct ggcaacctga cttgtatcgt cgcgatcgga  
801 aatgagaaca ggggcatctt gagcccctgc ggacggtgcc gacaggtgct  
156  
851 tctgatctg catcctggga tcaaagccat agtgaaggac agtgatggac  
901 agccgacggc agttgggatt cgtgaattgc tgcctctgg ttatgtgtgg  
951 gagggctaag cacaattcga gtcggtacc ttaagacca atgacttaca  
1001 aggcagctgt agatcttagc cacttttaa aagaaaagg gggactggaa  
1051 gggctaattc actccaacg aagacaagat ctgcttttg cttgtactgg

1101 gtctctctgg ttagaccaga tctgagcctg ggagctctct ggctaactag  
1151 ggaaccact gcttaagcct caataaagct tgccttgagt gcttcaagta  
1201 gtgtgtgccc gtctgttggtg tgactctggt aactagagat ccctcagacc  
1251 cttttagtca gtgtggaaaa tctctagcag tagtagttca tgtcatctta  
1301 ttattcagta tttataactt gcaaagaaat gaatatcaga gagtgagagg  
1351 aactgttta ttgcagctta taatggttac aaataaagca atagcatcac  
1401 aaattcaca aataaagcat tttttcact gcattctagt tgtggtttgt  
1451 ccaaactcat caatgtatct tatcatgtct ggctctagct atcccggccc  
1501 taactccgcc catcccggcc ctaactccgc ccagttccgc ccatttccg  
1551 ccccatggct gactaatttt tttatttat gcagaggccg aggccgcctc  
1601 ggctctgag ctattccaga agtagtgagg aggcttttt ggaggcctag  
1651 ggacgtacc aattcgcct atagtgagtc gtattacgcg cgctcactgg  
1701 ccgtcgtttt acaacgtct gactgggaaa accctggcgt tacccaactt  
1751 aatcgcttg cagcacatcc cctttcggc agctggcgta atagcgaaga  
1801 ggccgcacc gatcgcctt cccaacagtt gcgcagcctg aatggcgaat  
1851 gggacgcgc ctgtagcggc gcattaagcg cggcgggtgt ggtggttacg  
1901 cgcagcgtga ccgtacact tgccagcgc ctagcggccg ctctttcgc  
1951 tttcttcct tcctttctc ccacgttcgc cggctttccc cgtcaagctc  
2001 taaatcgggg gctccctta gggttccgat ttagtgcttt acggcacctc  
2051 gaccccaaaa aacttgatta ggtgatggt tcacgtagtg ggccatcgcc  
2101 ctgatagacg gttttcggc ctttgacgtt ggagtccacg ttcttaata  
2151 gtggactctt gttccaaact ggaacaacac tcaaccctat ctcggtctat  
2201 tcttttgatt tataagggat tttgccgatt tcggcctatt ggttaaaaa  
2251 tgagctgatt taacaaaaat ttaacgcgaa ttttaacaaa atattaacgc  
2301 ttacaattta ggtggcactt ttcggggaaa tgtgcgcgga Acccctattt

2351 gtttattttt ctaaatacat tcaaataatgt atccgctcat gagacaataa  
2401 ccctgataaa tgcttcaata  
atattgaaaa aggaagagta tgagtattca  
2451 acatttccgt gtcgccctta ttccttttt tgcggcattt tgccttcctg  
2501 tttttgctca cccagaaaac ctggtgaaag taaaagatgc tgaagatcag  
2551 ttgggtgcac gagtgggtta catcgaactg gatctcaaca gcggtaatg  
2601 ccttgagagt tttcgccccg aagaacgttt tccaatgatg agcactttta  
2651 aagttctgct atgtggcgcg gtattatccc gtattgacgc cgggcaagag  
2701 caactcggtc gccgcataca ctattctcag aatgacttgg ttgagtactc  
2751 accagtcaca gaaaagcatc ttacggatgg catgacagta agagaattat  
2801 gcagtgtctgc cataacctg agtgataaca ctgaggcaa cttacttctg  
2851 acaacgatcg gaggaccgaa ggagctaacc gcttttttgc acaacatggg  
2901 ggatcatgta actcgccttg atcgttggga accggagctg aatgaagcca  
2951 taccaaacga cgagcgtgac accacgatgc ctgtagcaat ggcaacaacg  
3001  
ttgcgcaaac tattaactgg cgaactactt actctagctt cccggcaaca  
3051 attaatagac tggatggagg cggataaagt tgcaggacca cttctgcgt  
157  
3101 cggcccttcc ggctggctgg tttattgctg ataaatctgg agccggtgag  
3151 cgtgggtctc gcggtatcat tgcagcactg gggccagatg gtaagccctc  
3201 ccgtatcgta gttatctaca cgacggggag tcaggcaact atggatgaac  
3251 gaaatagaca gatcgtgag ataggtgcct cactgattaa gcattgtaa  
3301 ctgtcagacc aagtttactc atatatactt tagattgatt taaaacttca  
3351 ttttaattt aaaaggatct aggtgaagat cctttttgat aatctcatga  
3401 ccaaaatccc ttaacgtgag tttcgttcc actgagcgtc agaccctgta

3451 gaaaagatca aaggatcttc ttgagatcct tttttctgc gcgtaatctg  
3501 ctgcttgcaa acaaaaaaac caccgctacc agcggtggtt tgttgcccgg  
3551 atcaagagct accaactctt tttccgaagg taactggctt cagcagagcg  
3601 cagataccea atactgttct tctagttag ccgtagttag gccaccactt  
3651 caagaactct gtagcaccgc ctacatacct cgctctgcta atcctgttac  
3701 cagtggctgc tgccagtggc gataagtcgt gtcttaccgg gttggactca  
3751 agacgatagt taccggataa ggccgagcgg tcgggctgaa cggggggttc  
3801 gtgcacacag cccagcttgg agcgaacgac ctacaccgaa ctgagatacc  
3851 tacagcgtga gctatgagaa agcggccacgc tttccgaagg gagaaaggcg  
3901 gacaggtatc cgtaagcgg cagggtcggg acaggagagc gcacgagggg  
3951 gcttccaggg ggaaacgcct ggtatcttta tagtcctgic gggtttcgcc  
4001 acctctgact tgagcgtcga tttttgtgat gctcgtcagg ggggcggagc  
4051 ctatggaaaa acgccagcaa cgcggccttt ttacggttcc tggcctttg  
4101 ctggcctttt gctcacatgt tctttctgc gttatcccct gattctgtgg  
4151 ataaccgtat taccgccttt gaggagctg ataccgctcg ccgagccga  
4201 acgaccgagc gcagcgagtc agtgagcgag gaagcgggaag agcggccaat  
4251 acgcaaaccg cctctccccg cgcgttgccc gattcattaa tgacgtggc  
4301 acgacaggtt tcccactgg aaagcgggca gtgagcgaac cgcaattaat  
4351 gtgagttagc tactcatta ggcacccag gctttactt ttatgcttcc  
4401 ggctcgtatg ttgtgtggaa ttgtgagcgg ataacaattt cacacaggaa  
4451 acagctatga ccatgattac gccaaagcgc caattaacc tactaaagg  
4501 gaacaaaagc tggagctgca agcttaatgt agtcttatgc aatactctg  
4551 tagtctgca acatggtaac gatgagttag caacatgcct tacaaggaga  
4601 gaaaaagcac cgtgcatgcc gattggtgga agtaaggtgg tacgatcgtg  
4651 ccttattagg aaggcaacag acgggtctga catggattgg acgaaccact

4701 gaattgccgc attgcagaga tattgtattt aagtcctag ctcgatacat  
4751 aaacgggtct ctctggtag accagatctg agcctgggag ctctctggct  
4801 aactagggaa cccactgctt aagcctcaat aaagcttgcc ttgagtgctt  
4851 caagtagtgt gtgccgtct gttgtgtgac tctggtaact agagatccct  
4901 cagacccttt tagtcagtgt ggaaaatctc tagcagtggc gccgaacag  
4951 ggacttgaaa gcgaaagga qaccagagga gctctctcga cgcaggactc  
5001 ggcttgctga agcgcgcacg gcaagaggcg agggcgcg actggtgagt  
5051 acgcaaaaa tttgactatg cggaggctag aaggagagag atgggtgcga  
5101 gagcgtcagt attaagcggg ggagaattag atcgcgatgg gaaaaattc  
5151 ggttaaggcc agggggaaag aaaaaatata aattaaaca tatagtatgg  
5201 gcaagcaggg agctagaacg attcgcagtt aatcctggcc tgtagaac  
5251 atcagaaggc tgtagacaaa tactgggaca gctacaacca tccctcaga  
5301 caggatcaga agaacttaga tcattatata atacagtagc aaccctctat  
158  
5351 tgtgtgcatc aaaggataga gataaaagac accaaggaag cttagacaa  
5401 gatagaggaa gagcaaaaca aaagtaagac caccgcacag caagcgccg  
5451 ctgatcttca gacctggagg aggagatatg agggacaatt ggagaagtga  
5501 attatataaa tataaagtag  
taaaaattga accattagga gtagcaccca  
5551 ccaaggcaaa gagaagagtg gtgcagagag aaaaaagagc agtgggaata  
5601 ggagctttgt tcctggggtt cttgggagca gcaggaagca ctatgggagc  
5651 agcgtcaatg acgctgacgg tacaggccag acaattattg tctggtatag  
5701 tgcagcagca gaacaattg ctgagggcta ttgaggcgca acagcatctg  
5751 ttgcaactca cagtctgggg catcaagcag ctccaggcaa gaatcctggc  
5801 tgtgaaaga tacctaaagg atcaacagct cctggggatt tggggtgct

5851 ctgaaaact cattgcacc actgctgtgc cttggaatgc tagttggagt  
5901 aataaatctc tggaacagat ttggaatcac acgacctgga tggagtggga  
5951 cagagaaatt aacaattaca caagcttaat acactcctta attgaagaat  
6001 cgcaaaacca gcaagaaaag aatgaacaag aattattgga attagataaa  
6051 tgggcaagtt tgtggaattg gtttaacata acaaattggc tgtggtatat  
6101 aaaattattc ataatgatag taggaggctt gtaggttta agaatagttt  
6151 ttgctgtact ttctatagtg aatagagtta ggcagggata ttcaccatta  
6201 tcgtttcaga cccacctccc aaccccgagg ggacccgaca ggcccgaagg  
6251 aatagaagaa gaaggtggag agagagacag agacagatcc attcgattag  
6301 tgaacggatc tcgacggat cgataagctt gggagttccg cgttacataa  
6351 cttacggtaa atggcccgc tggctgaccg cccaacgacc cccgccatt  
6401 gacgtcaata atgacgtatg ttccatagt aacgccaata gggactttcc  
6451 attgacgtca atgggtggag tatttacggt aaactgccca cttggcagta  
6501 catcaagtgt atcatatgcc aagtagccc cctattgacg tcaatgacgg  
6551 taaatggccc gcctggcatt atgccagta catgacctta tgggactttc  
6601 ctacttgga gtacatctac gtattagtca tcgctattac catggtgatg  
6651 cggttttggc agtacatcaa tgggcgtgga tagcggtttg actcacgggg  
6701 atttcaagt ctccaccca ttgacgtcaa tgggagtttg ttttggcacc  
6751 aaaatcaacg ggactttcca aatgtcgtg acaactccgc cccattgacg  
6801 caaatggcg gtaggcgtgt acggtgggag gtctatataa gcagagctcg  
6851 tttagtgaac cgtcagatcg cctggagacg ccatccacgc tgtttgacc  
6901 tccatagaag acaccgactc tagaggatcc actagtccag tgtggtggaa  
6951 ttgatccctt caccatgtgg gtctgatga gctggctggc cttcgcggca  
7001 gggctggtag ccggaacaca ggtccagat gggcagttct gccctgttc  
7051 ctgctgcctt gaccaggag gagccaacta cagctgctgt aacccttctc

7101 tggacacatg gcctagaata acgagccatc atctagatgg ctctgccag  
7151 acccatggcc actgtcctgc tggctattct tgtcttctca ctgtgtctgg  
7201 gacttcacg tgctgcccg tctctaaggg tgtgtcttgt ggtgatggct  
7251 accactgctg cccccagggc ttccactgta gtgcagatgg gaaatcctgc  
7301 ttccagatgt cagataacct cttgggtgct gtccagtgtc ctgggagcca  
7351 gtttgaatgt cctgactctg ccacctgctg cattatggtt gatggttcgt  
7401 ggggatgttg tccatgccc caggcctctt gctgtgaaga cagagtgcac  
7451 tgctgtcccc atggggcctc ctgtgacctg gttcacacac gatgcgtttc  
7501 acccacgggc acccacacc tactaaagaa gttccctgca caaaagacca  
7551 acagggcagt gtctttgcct ttttctgtcg tgtgccctga tgctaagacc  
159  
7601 cagtgtcccg atgattctac ctgctgtgag ctaccactg ggaagtatgg  
7651 ctgctgtcca atgccaatg ccatctgctg ttccgaccac ctgcactgct  
7701 gccccagga cactgtatgt gacctgatcc agagtaagtg cctatccaag  
7751 aactacacca cggatctcct gaccaagctg cctggatacc cagtgaagga  
7801 ggtgaagtgc gacatggagg tgagctgccc tgaaggatat acctgctgcc  
7851 gcctcaacac tggggcctgg ggctgctgtc catttgcaa ggccgtgtgt  
7901 tgtgaggatc acattcattg ctgcccggca gggtttcagt gtcacacaga  
7951 gaaaggaacc tgcgaaatgg gtatcctcca agtacctgg atgaagaagg  
8001 tcatagcccc cctccgcctg ccagaccac agatcttgaa gaggatata  
8051 cttgtgatg acttactag gtgtcctaca aacaatacct gctgcaaact  
8101 caattctggg gactggggct gctgtccat cccagaggct gtctgctgct  
8151 cagacaacca gcattgctgc cctcagggtc tcacatgtct ggctcagggg  
8201 tactgtcaga agggagacac aatggtggct ggcctggaga agatacctgc  
8251 ccgccagaca accccgctcc aaattggaga tatcggttgt gaccagcata

8301 ccagctgccc agtagggcaa acctgctgcc caagcctcaa gggaagttgg  
8351 gcctgctgcc agtgcacca tgctgtgtgc tgtgaggacc ggcagcactg  
8401 ttccccggcc gggtagacct gcaatgtgaa ggcgaggacc tgtgagaagg  
8451 atgtcgattt tatccagcct cccgtgctcc tgaccctcgg ccctaagtt  
8501 gggaatgtgg agtgtggaga agggcatttc tgccatgata accagacctg  
8551 ttgtaaagac agtgcaggag tctgggcctg ctgtccctac ctaaagggtg  
8601 tctgctgtag agatggacgt cactgttgcc ccggtggctt cactgttca-  
8651 gccaggggaa ccaagtgttt gcgaaagaag attcctcgct gggacatgtt  
8701 tttgagggat ccggtcccaa gaccgctact gtag
